# Supplementary material for: Identification of An Immune Signature Predicting Prognosis Risk of Patients in Gastric Cancer
Source: Research Square preprint supplement (doi:10.21203/rs.3.rs-139109/v1), 2021-01-05
Supplement: Supplementary file 1 [file b37e4a0170cb20cb89d60a29.docx]

Supplementary Table 1

The 47 immune-related genes consist of the signature and corresponding coefficients.
